# Supplementary material for: Stable Colonization of Orally Administered Lactobacillus casei SY13 Alters the Gut Microbiota
Source: Hindawi journal article supplement (doi:10.1155/2020/5281639), 2020-01-01
Supplement: f1 [file 5281639.f1.pdf]

| ID      | BP11 | BP12 | BP13 | B2BP21 | B2BP22 | B2BP23 | B28BP21 |     |
|---------|------|------|------|--------|--------|--------|---------|-----|
| OTU_1   |      | 11   | 53   | 3      | 95     | 76     | 75      | 540 |
| OTU_10  |      | 20   | 27   | 0      | 33     | 1      | 0       | 0   |
| OTU_100 |      | 0    | 0    | 0      | 1      | 1      | 3       | 0   |
| OTU_101 |      | 0    | 2    | 0      | 2      | 3      | 0       | 1   |
| OTU_102 |      | 0    | 0    | 2      | 0      | 0      | 0       | 0   |
| OTU_103 |      | 1    | 2    | 0      | 2      | 2      | 3       | 1   |
| OTU_104 |      | 0    | 1    | 0      | 0      | 1      | 1       | 1   |
| OTU_105 |      | 0    | 0    | 0      | 2      | 0      | 3       | 0   |
| OTU_106 |      | 0    | 1    | 1      | 2      | 3      | 0       | 2   |
| OTU_107 |      | 0    | 1    | 0      | 2      | 1      | 2       | 0   |
| OTU_108 |      | 1    | 0    | 2      | 0      | 7      | 5       | 2   |
| OTU_109 |      | 0    | 3    | 0      | 2      | 5      | 2       | 0   |
| OTU_11  |      | 8    | 6    | 3      | 12     | 10     | 12      | 5   |
| OTU_110 |      | 0    | 0    | 0      | 1      | 2      | 5       | 1   |
| OTU_111 |      | 0    | 0    | 0      | 4      | 1      | 0       | 3   |
| OTU_112 |      | 0    | 0    | 0      | 0      | 1      | 5       | 0   |
| OTU_113 |      | 0    | 3    | 1      | 1      | 0      | 0       | 5   |
| OTU_114 |      | 0    | 0    | 0      | 0      | 0      | 0       | 1   |
| OTU_115 |      | 0    | 1    | 6      | 0      | 6      | 0       | 2   |
| OTU_117 |      | 1    | 0    | 0      | 0      | 2      | 0       | 1   |
| OTU_118 |      | 0    | 0    | 0      | 0      | 1      | 0       | 3   |
| OTU_119 |      | 1    | 0    | 0      | 0      | 1      | 0       | 0   |
| OTU_12  |      | 5    | 0    | 0      | 14     | 13     | 16      | 3   |
| OTU_121 |      | 0    | 0    | 0      | 0      | 0      | 0       | 2   |
| OTU_122 |      | 0    | 1    | 1      | 0      | 3      | 1       | 1   |
| OTU_123 |      | 0    | 0    | 0      | 0      | 2      | 4       | 1   |
| OTU_124 |      | 0    | 0    | 0      | 0      | 0      | 0       | 1   |
| OTU_125 |      | 259  | 55   | 85     | 249    | 139    | 138     | 185 |
| OTU_126 |      | 0    | 0    | 5      | 1      | 3      | 0       | 3   |
| OTU_127 |      | 0    | 0    | 1      | 1      | 0      | 1       | 1   |
| OTU_128 |      | 0    | 0    | 0      | 0      | 1      | 0       | 0   |
| OTU_129 |      | 0    | 0    | 0      | 0      | 0      | 1       | 1   |
| OTU_13  |      | 15   | 4    | 5      | 14     | 7      | 4       | 12  |
| OTU_130 |      | 0    | 0    | 0      | 0      | 2      | 0       | 0   |
| OTU_131 |      | 0    | 2    | 1      | 1      | 1      | 0       | 0   |
| OTU_132 |      | 0    | 0    | 0      | 0      | 0      | 2       | 0   |
| OTU_133 |      | 0    | 0    | 0      | 0      | 0      | 0       | 1   |
| OTU_134 |      | 0    | 0    | 0      | 1      | 4      | 0       | 0   |
| OTU_135 |      | 0    | 0    | 0      | 1      | 1      | 0       | 0   |
| OTU_136 |      | 0    | 0    | 0      | 1      | 0      | 0       | 0   |
| OTU_137 |      | 0    | 0    | 0      | 1      | 0      | 0       | 0   |
| OTU_138 |      | 0    | 1    | 1      | 2      | 9      | 1       | 0   |
| OTU_139 |      | 45   | 37   | 18     | 45     | 47     | 53      | 25  |
| OTU_14  |      | 7    | 2    | 13     | 11     | 3      | 7       | 18  |
| OTU_140 |      | 0    | 1    | 0      | 0      | 4      | 1       | 1   |
| OTU_141 |      | 0    | 0    | 0      | 0      | 0      | 0       | 0   |
| OTU_142 |      | 429  | 551  | 179    | 284    | 288    | 234     | 214 |
| OTU_143 |      | 386  | 379  | 164    | 178    | 196    | 165     | 83  |
| OTU_144 |      | 248  | 84   | 72     | 58     | 55     | 27      | 149 |
| OTU_145 |      | 30   | 73   | 13     | 9      | 4      | 27      | 6   |

|         |   |    |    |    |    |    |   |
|---------|---|----|----|----|----|----|---|
| OTU_146 | 7 | 19 | 18 | 19 | 8  | 11 | 5 |
| OTU_147 | 5 | 31 | 5  | 25 | 15 | 3  | 7 |
| OTU_148 | 0 | 6  | 1  | 0  | 3  | 4  | 2 |
| OTU_149 | 0 | 0  | 3  | 1  | 8  | 1  | 2 |
| OTU_15  | 2 | 0  | 0  | 2  | 14 | 7  | 0 |
| OTU_150 | 0 | 0  | 0  | 0  | 5  | 2  | 0 |
| OTU_151 | 0 | 0  | 0  | 2  | 1  | 3  | 2 |
| OTU_152 | 1 | 2  | 0  | 0  | 3  | 0  | 2 |
| OTU_153 | 0 | 1  | 0  | 1  | 9  | 1  | 1 |
| OTU_154 | 0 | 0  | 0  | 1  | 3  | 1  | 2 |
| OTU_155 | 0 | 0  | 0  | 1  | 0  | 0  | 2 |
| OTU_156 | 1 | 2  | 1  | 2  | 2  | 0  | 1 |
| OTU_157 | 0 | 7  | 0  | 1  | 2  | 3  | 0 |
| OTU_158 | 0 | 0  | 0  | 0  | 5  | 0  | 3 |
| OTU_159 | 0 | 1  | 0  | 1  | 6  | 1  | 4 |
| OTU_16  | 0 | 6  | 6  | 5  | 36 | 0  | 0 |
| OTU_160 | 0 | 3  | 4  | 1  | 8  | 1  | 8 |
| OTU_161 | 0 | 0  | 1  | 0  | 4  | 1  | 0 |
| OTU_162 | 0 | 6  | 0  | 3  | 2  | 3  | 3 |
| OTU_163 | 0 | 0  | 0  | 0  | 0  | 0  | 0 |
| OTU_164 | 1 | 2  | 7  | 1  | 11 | 2  | 5 |
| OTU_165 | 0 | 1  | 0  | 1  | 0  | 1  | 4 |
| OTU_166 | 0 | 2  | 0  | 1  | 0  | 1  | 1 |
| OTU_167 | 0 | 0  | 0  | 0  | 0  | 1  | 0 |
| OTU_168 | 1 | 1  | 1  | 5  | 6  | 5  | 1 |
| OTU_169 | 0 | 0  | 0  | 1  | 0  | 1  | 3 |
| OTU_17  | 1 | 1  | 0  | 6  | 11 | 0  | 1 |
| OTU_170 | 0 | 0  | 0  | 0  | 0  | 2  | 3 |
| OTU_171 | 0 | 1  | 0  | 2  | 1  | 2  | 0 |
| OTU_172 | 0 | 0  | 0  | 0  | 2  | 1  | 0 |
| OTU_173 | 0 | 1  | 0  | 1  | 1  | 0  | 3 |
| OTU_174 | 0 | 1  | 0  | 2  | 1  | 0  | 0 |
| OTU_175 | 1 | 3  | 1  | 1  | 5  | 4  | 3 |
| OTU_176 | 0 | 1  | 0  | 3  | 3  | 1  | 3 |
| OTU_177 | 0 | 0  | 0  | 0  | 2  | 0  | 0 |
| OTU_178 | 1 | 1  | 0  | 1  | 1  | 0  | 0 |
| OTU_179 | 0 | 0  | 0  | 1  | 4  | 0  | 0 |
| OTU_18  | 0 | 0  | 0  | 0  | 0  | 0  | 4 |
| OTU_180 | 0 | 0  | 1  | 0  | 0  | 0  | 4 |
| OTU_181 | 1 | 0  | 0  | 0  | 0  | 0  | 0 |
| OTU_182 | 0 | 3  | 0  | 0  | 2  | 0  | 2 |
| OTU_184 | 0 | 1  | 0  | 0  | 1  | 2  | 0 |
| OTU_186 | 0 | 0  | 0  | 1  | 3  | 1  | 0 |
| OTU_187 | 0 | 1  | 5  | 0  | 0  | 3  | 1 |
| OTU_188 | 0 | 1  | 3  | 1  | 4  | 0  | 0 |
| OTU_189 | 0 | 0  | 0  | 0  | 1  | 1  | 2 |
| OTU_19  | 0 | 0  | 0  | 0  | 0  | 0  | 4 |
| OTU_190 | 0 | 0  | 0  | 0  | 4  | 1  | 0 |
| OTU_191 | 0 | 0  | 4  | 0  | 3  | 0  | 4 |
| OTU_192 | 0 | 0  | 1  | 0  | 4  | 0  | 1 |
| OTU_193 | 0 | 2  | 0  | 0  | 8  | 3  | 2 |

|         |     |     |     |     |     |     |     |
|---------|-----|-----|-----|-----|-----|-----|-----|
| OTU_194 | 0   | 0   | 0   | 0   | 0   | 3   | 0   |
| OTU_195 | 0   | 2   | 0   | 1   | 0   | 0   | 0   |
| OTU_196 | 16  | 33  | 2   | 10  | 3   | 31  | 52  |
| OTU_197 | 17  | 5   | 4   | 35  | 72  | 10  | 19  |
| OTU_198 | 5   | 5   | 3   | 52  | 17  | 21  | 6   |
| OTU_199 | 15  | 13  | 1   | 4   | 3   | 6   | 13  |
| OTU_2   | 11  | 4   | 2   | 27  | 9   | 15  | 10  |
| OTU_20  | 1   | 12  | 0   | 1   | 4   | 5   | 3   |
| OTU_200 | 0   | 2   | 0   | 0   | 0   | 0   | 0   |
| OTU_201 | 0   | 1   | 0   | 0   | 0   | 0   | 0   |
| OTU_203 | 0   | 0   | 0   | 3   | 0   | 0   | 0   |
| OTU_204 | 0   | 0   | 0   | 3   | 1   | 0   | 1   |
| OTU_205 | 0   | 0   | 0   | 0   | 0   | 0   | 0   |
| OTU_206 | 0   | 1   | 0   | 0   | 3   | 1   | 0   |
| OTU_207 | 0   | 778 | 1   | 1   | 0   | 0   | 1   |
| OTU_208 | 230 | 278 | 4   | 2   | 33  | 3   | 11  |
| OTU_209 | 16  | 0   | 3   | 0   | 0   | 2   | 48  |
| OTU_21  | 2   | 6   | 3   | 4   | 6   | 13  | 5   |
| OTU_210 | 1   | 0   | 0   | 0   | 0   | 0   | 1   |
| OTU_211 | 0   | 0   | 1   | 0   | 0   | 0   | 3   |
| OTU_212 | 29  | 1   | 251 | 137 | 51  | 307 | 16  |
| OTU_213 | 0   | 0   | 0   | 0   | 0   | 3   | 0   |
| OTU_214 | 1   | 0   | 3   | 2   | 0   | 1   | 1   |
| OTU_215 | 0   | 2   | 0   | 0   | 0   | 0   | 0   |
| OTU_216 | 0   | 0   | 3   | 0   | 0   | 3   | 0   |
| OTU_217 | 0   | 0   | 1   | 4   | 3   | 1   | 0   |
| OTU_218 | 0   | 0   | 0   | 0   | 1   | 1   | 0   |
| OTU_219 | 0   | 0   | 0   | 0   | 0   | 17  | 0   |
| OTU_22  | 0   | 29  | 0   | 0   | 5   | 0   | 0   |
| OTU_220 | 0   | 0   | 0   | 2   | 0   | 0   | 0   |
| OTU_221 | 4   | 2   | 2   | 1   | 0   | 7   | 47  |
| OTU_222 | 1   | 1   | 0   | 0   | 0   | 0   | 1   |
| OTU_223 | 5   | 1   | 0   | 0   | 0   | 3   | 49  |
| OTU_224 | 0   | 2   | 0   | 0   | 1   | 1   | 4   |
| OTU_225 | 47  | 732 | 748 | 654 | 856 | 530 | 21  |
| OTU_226 | 22  | 87  | 19  | 160 | 132 | 59  | 231 |
| OTU_227 | 186 | 429 | 216 | 109 | 204 | 266 | 53  |
| OTU_228 | 0   | 0   | 0   | 1   | 0   | 0   | 1   |
| OTU_229 | 9   | 11  | 80  | 40  | 19  | 95  | 160 |
| OTU_23  | 2   | 6   | 1   | 0   | 6   | 2   | 1   |
| OTU_230 | 54  | 240 | 23  | 65  | 198 | 148 | 275 |
| OTU_231 | 100 | 80  | 98  | 23  | 11  | 64  | 19  |
| OTU_232 | 57  | 19  | 61  | 105 | 72  | 31  | 14  |
| OTU_233 | 35  | 57  | 47  | 81  | 53  | 70  | 48  |
| OTU_234 | 65  | 0   | 0   | 22  | 8   | 45  | 118 |
| OTU_235 | 10  | 57  | 1   | 15  | 27  | 27  | 47  |
| OTU_236 | 5   | 0   | 3   | 16  | 124 | 12  | 31  |
| OTU_237 | 67  | 32  | 28  | 6   | 17  | 3   | 91  |
| OTU_238 | 58  | 292 | 14  | 70  | 219 | 122 | 119 |
| OTU_239 | 9   | 17  | 38  | 53  | 14  | 49  | 36  |
| OTU_24  | 2   | 0   | 2   | 1   | 1   | 0   | 2   |

|         |      |      |      |      |     |     |      |
|---------|------|------|------|------|-----|-----|------|
| OTU_240 | 7    | 9    | 5    | 61   | 9   | 35  | 8    |
| OTU_241 | 2    | 0    | 1    | 112  | 43  | 20  | 3    |
| OTU_242 | 6    | 5    | 1    | 16   | 12  | 10  | 39   |
| OTU_243 | 0    | 314  | 61   | 2    | 0   | 0   | 4    |
| OTU_244 | 0    | 0    | 0    | 24   | 7   | 0   | 20   |
| OTU_245 | 9    | 19   | 16   | 2    | 0   | 6   | 49   |
| OTU_246 | 3    | 3    | 8    | 21   | 7   | 29  | 12   |
| OTU_247 | 42   | 12   | 15   | 6    | 16  | 21  | 10   |
| OTU_248 | 38   | 34   | 18   | 20   | 10  | 17  | 1    |
| OTU_249 | 0    | 0    | 68   | 9    | 0   | 0   | 0    |
| OTU_25  | 2    | 0    | 0    | 0    | 2   | 1   | 0    |
| OTU_250 | 9    | 5    | 7    | 14   | 5   | 4   | 5    |
| OTU_251 | 8    | 17   | 3    | 11   | 4   | 14  | 5    |
| OTU_252 | 1    | 2    | 2    | 6    | 3   | 10  | 7    |
| OTU_253 | 4    | 2    | 3    | 1    | 4   | 6   | 8    |
| OTU_254 | 0    | 1    | 1    | 3    | 4   | 6   | 14   |
| OTU_255 | 2    | 1    | 2    | 2    | 13  | 7   | 0    |
| OTU_256 | 5    | 2    | 10   | 5    | 1   | 2   | 5    |
| OTU_257 | 397  | 1041 | 0    | 104  | 937 | 664 | 346  |
| OTU_258 | 2699 | 2    | 2577 | 1647 | 33  | 55  | 2450 |
| OTU_259 | 12   | 2    | 6    | 2    | 0   | 1   | 1    |
| OTU_26  | 3    | 0    | 0    | 6    | 1   | 1   | 0    |
| OTU_260 | 1    | 0    | 0    | 6    | 2   | 5   | 4    |
| OTU_261 | 2    | 0    | 0    | 2    | 0   | 0   | 8    |
| OTU_262 | 0    | 0    | 16   | 6    | 0   | 0   | 0    |
| OTU_263 | 0    | 0    | 0    | 0    | 0   | 0   | 10   |
| OTU_264 | 0    | 0    | 0    | 4    | 4   | 1   | 23   |
| OTU_265 | 0    | 0    | 0    | 0    | 0   | 0   | 0    |
| OTU_266 | 1    | 2    | 1    | 0    | 0   | 7   | 0    |
| OTU_267 | 0    | 0    | 0    | 2    | 0   | 0   | 0    |
| OTU_268 | 0    | 1    | 0    | 1    | 0   | 2   | 4    |
| OTU_269 | 27   | 41   | 56   | 0    | 36  | 43  | 32   |
| OTU_27  | 0    | 0    | 0    | 0    | 0   | 0   | 3    |
| OTU_270 | 162  | 0    | 556  | 2    | 0   | 147 | 107  |
| OTU_271 | 3    | 7    | 36   | 5    | 54  | 15  | 16   |
| OTU_272 | 4    | 0    | 57   | 32   | 39  | 36  | 6    |
| OTU_273 | 58   | 0    | 33   | 61   | 97  | 339 | 37   |
| OTU_274 | 1    | 6    | 0    | 46   | 14  | 29  | 48   |
| OTU_275 | 4    | 97   | 48   | 15   | 643 | 7   | 6    |
| OTU_276 | 0    | 8    | 0    | 5    | 3   | 0   | 10   |
| OTU_277 | 0    | 26   | 0    | 6    | 2   | 4   | 14   |
| OTU_278 | 0    | 7    | 1    | 0    | 0   | 0   | 0    |
| OTU_279 | 0    | 0    | 0    | 1    | 0   | 0   | 0    |
| OTU_28  | 1    | 0    | 0    | 4    | 4   | 0   | 2    |
| OTU_280 | 1    | 0    | 0    | 0    | 0   | 1   | 5    |
| OTU_281 | 2    | 19   | 54   | 6    | 10  | 39  | 16   |
| OTU_282 | 1    | 12   | 1    | 20   | 215 | 22  | 52   |
| OTU_283 | 0    | 0    | 0    | 0    | 0   | 0   | 1    |
| OTU_284 | 2    | 0    | 1    | 0    | 0   | 3   | 2    |
| OTU_285 | 6    | 32   | 6    | 39   | 31  | 26  | 190  |
| OTU_286 | 125  | 1149 | 162  | 121  | 172 | 52  | 777  |

|         |     |     |     |     |     |     |     |
|---------|-----|-----|-----|-----|-----|-----|-----|
| OTU_287 | 0   | 9   | 0   | 0   | 2   | 2   | 11  |
| OTU_288 | 0   | 0   | 0   | 0   | 0   | 0   | 0   |
| OTU_289 | 0   | 1   | 0   | 0   | 0   | 1   | 0   |
| OTU_29  | 1   | 0   | 0   | 6   | 0   | 0   | 0   |
| OTU_290 | 1   | 0   | 18  | 14  | 11  | 24  | 2   |
| OTU_291 | 3   | 0   | 13  | 21  | 31  | 1   | 2   |
| OTU_292 | 60  | 22  | 15  | 111 | 260 | 35  | 68  |
| OTU_293 | 6   | 67  | 3   | 67  | 106 | 109 | 46  |
| OTU_294 | 0   | 0   | 0   | 2   | 0   | 5   | 0   |
| OTU_295 | 0   | 57  | 0   | 0   | 0   | 5   | 0   |
| OTU_296 | 0   | 0   | 0   | 220 | 2   | 79  | 53  |
| OTU_297 | 0   | 0   | 0   | 3   | 3   | 0   | 7   |
| OTU_298 | 0   | 0   | 0   | 1   | 1   | 0   | 7   |
| OTU_299 | 0   | 0   | 0   | 0   | 0   | 0   | 3   |
| OTU_3   | 5   | 12  | 7   | 10  | 12  | 12  | 22  |
| OTU_30  | 0   | 0   | 0   | 0   | 2   | 1   | 2   |
| OTU_300 | 5   | 5   | 4   | 20  | 14  | 21  | 28  |
| OTU_301 | 0   | 0   | 0   | 1   | 0   | 0   | 1   |
| OTU_302 | 234 | 17  | 110 | 40  | 68  | 58  | 300 |
| OTU_304 | 6   | 53  | 4   | 23  | 26  | 87  | 130 |
| OTU_305 | 8   | 59  | 2   | 16  | 9   | 32  | 82  |
| OTU_306 | 0   | 0   | 0   | 0   | 0   | 0   | 0   |
| OTU_307 | 0   | 0   | 7   | 8   | 0   | 0   | 0   |
| OTU_308 | 0   | 0   | 0   | 0   | 0   | 0   | 0   |
| OTU_309 | 0   | 0   | 0   | 0   | 2   | 0   | 12  |
| OTU_31  | 3   | 0   | 0   | 0   | 7   | 0   | 0   |
| OTU_310 | 0   | 0   | 4   | 8   | 0   | 8   | 0   |
| OTU_311 | 3   | 0   | 1   | 1   | 0   | 2   | 36  |
| OTU_312 | 0   | 6   | 8   | 7   | 7   | 6   | 11  |
| OTU_314 | 204 | 176 | 216 | 43  | 400 | 41  | 43  |
| OTU_315 | 1   | 0   | 0   | 8   | 5   | 3   | 0   |
| OTU_316 | 0   | 0   | 0   | 2   | 0   | 3   | 2   |
| OTU_317 | 1   | 6   | 0   | 1   | 4   | 11  | 76  |
| OTU_318 | 344 | 0   | 84  | 80  | 174 | 120 | 62  |
| OTU_319 | 0   | 0   | 1   | 1   | 6   | 1   | 3   |
| OTU_32  | 0   | 0   | 0   | 4   | 0   | 6   | 0   |
| OTU_320 | 4   | 0   | 13  | 17  | 7   | 13  | 30  |
| OTU_321 | 3   | 1   | 10  | 14  | 41  | 4   | 7   |
| OTU_322 | 1   | 4   | 2   | 11  | 18  | 7   | 17  |
| OTU_323 | 0   | 0   | 0   | 0   | 3   | 0   | 1   |
| OTU_324 | 1   | 0   | 25  | 0   | 29  | 10  | 0   |
| OTU_325 | 0   | 6   | 1   | 1   | 6   | 0   | 5   |
| OTU_326 | 0   | 0   | 0   | 1   | 0   | 102 | 1   |
| OTU_327 | 28  | 56  | 35  | 39  | 61  | 42  | 35  |
| OTU_328 | 0   | 84  | 0   | 85  | 25  | 6   | 12  |
| OTU_329 | 20  | 99  | 4   | 39  | 75  | 55  | 147 |
| OTU_33  | 0   | 0   | 1   | 7   | 3   | 0   | 1   |
| OTU_330 | 49  | 43  | 26  | 36  | 25  | 22  | 11  |
| OTU_331 | 24  | 16  | 30  | 55  | 22  | 22  | 8   |
| OTU_332 | 3   | 0   | 4   | 102 | 15  | 39  | 5   |
| OTU_333 | 0   | 0   | 0   | 60  | 0   | 15  | 0   |

|         |     |     |    |      |     |     |     |
|---------|-----|-----|----|------|-----|-----|-----|
| OTU_334 | 2   | 40  | 5  | 5    | 139 | 11  | 60  |
| OTU_335 | 4   | 10  | 5  | 18   | 60  | 18  | 45  |
| OTU_336 | 4   | 55  | 0  | 0    | 1   | 0   | 106 |
| OTU_337 | 56  | 60  | 41 | 28   | 23  | 30  | 1   |
| OTU_338 | 18  | 0   | 19 | 10   | 10  | 28  | 5   |
| OTU_339 | 0   | 16  | 0  | 6    | 30  | 28  | 23  |
| OTU_34  | 0   | 0   | 0  | 2    | 0   | 0   | 0   |
| OTU_340 | 3   | 0   | 0  | 10   | 3   | 25  | 1   |
| OTU_341 | 0   | 0   | 9  | 0    | 0   | 3   | 0   |
| OTU_342 | 3   | 31  | 0  | 9    | 13  | 6   | 38  |
| OTU_343 | 6   | 25  | 12 | 4    | 1   | 5   | 4   |
| OTU_344 | 4   | 41  | 1  | 10   | 10  | 16  | 43  |
| OTU_345 | 3   | 6   | 0  | 6    | 4   | 4   | 9   |
| OTU_346 | 0   | 2   | 1  | 0    | 2   | 6   | 10  |
| OTU_347 | 5   | 0   | 0  | 10   | 3   | 8   | 12  |
| OTU_348 | 5   | 1   | 5  | 9    | 8   | 14  | 8   |
| OTU_349 | 35  | 148 | 10 | 28   | 83  | 99  | 86  |
| OTU_35  | 6   | 0   | 0  | 0    | 0   | 2   | 0   |
| OTU_350 | 4   | 9   | 4  | 2    | 6   | 5   | 5   |
| OTU_351 | 0   | 3   | 3  | 0    | 0   | 3   | 4   |
| OTU_352 | 0   | 0   | 0  | 6    | 0   | 0   | 0   |
| OTU_353 | 0   | 0   | 1  | 6    | 1   | 0   | 35  |
| OTU_354 | 0   | 0   | 0  | 0    | 18  | 0   | 0   |
| OTU_355 | 0   | 0   | 1  | 2    | 2   | 3   | 0   |
| OTU_356 | 117 | 0   | 36 | 39   | 19  | 212 | 101 |
| OTU_357 | 0   | 0   | 0  | 1    | 5   | 0   | 0   |
| OTU_358 | 0   | 0   | 1  | 0    | 0   | 1   | 5   |
| OTU_359 | 7   | 22  | 3  | 7    | 31  | 28  | 54  |
| OTU_36  | 1   | 0   | 0  | 4    | 1   | 0   | 0   |
| OTU_360 | 0   | 1   | 0  | 0    | 3   | 2   | 9   |
| OTU_361 | 0   | 0   | 0  | 1    | 2   | 2   | 0   |
| OTU_362 | 28  | 0   | 37 | 1034 | 151 | 281 | 2   |
| OTU_363 | 5   | 2   | 3  | 11   | 28  | 1   | 2   |
| OTU_364 | 0   | 2   | 0  | 1    | 9   | 0   | 33  |
| OTU_365 | 0   | 0   | 1  | 2    | 18  | 11  | 2   |
| OTU_366 | 0   | 9   | 1  | 8    | 2   | 0   | 27  |
| OTU_367 | 0   | 0   | 0  | 1    | 0   | 4   | 15  |
| OTU_368 | 3   | 1   | 4  | 0    | 1   | 3   | 10  |
| OTU_369 | 0   | 0   | 0  | 0    | 0   | 1   | 12  |
| OTU_37  | 5   | 3   | 4  | 0    | 0   | 0   | 0   |
| OTU_370 | 36  | 110 | 27 | 24   | 14  | 19  | 45  |
| OTU_371 | 3   | 0   | 0  | 0    | 0   | 5   | 0   |
| OTU_372 | 1   | 29  | 0  | 0    | 0   | 8   | 3   |
| OTU_373 | 0   | 0   | 0  | 0    | 1   | 0   | 25  |
| OTU_374 | 0   | 0   | 4  | 4    | 3   | 0   | 10  |
| OTU_375 | 1   | 0   | 0  | 1    | 0   | 1   | 15  |
| OTU_376 | 2   | 3   | 0  | 10   | 44  | 28  | 110 |
| OTU_377 | 1   | 0   | 9  | 6    | 3   | 0   | 14  |
| OTU_378 | 0   | 0   | 0  | 1    | 2   | 0   | 0   |
| OTU_379 | 1   | 9   | 1  | 4    | 19  | 4   | 7   |
| OTU_38  | 8   | 2   | 2  | 10   | 4   | 1   | 4   |

|         |     |     |     |     |     |     |     |
|---------|-----|-----|-----|-----|-----|-----|-----|
| OTU_380 | 0   | 0   | 0   | 0   | 2   | 1   | 9   |
| OTU_381 | 1   | 0   | 3   | 1   | 6   | 0   | 5   |
| OTU_382 | 879 | 109 | 123 | 392 | 659 | 130 | 42  |
| OTU_383 | 3   | 0   | 64  | 39  | 35  | 106 | 14  |
| OTU_384 | 0   | 0   | 0   | 0   | 0   | 0   | 1   |
| OTU_385 | 0   | 0   | 0   | 0   | 0   | 0   | 2   |
| OTU_386 | 0   | 1   | 6   | 2   | 3   | 0   | 11  |
| OTU_387 | 0   | 2   | 0   | 1   | 1   | 1   | 8   |
| OTU_389 | 2   | 16  | 7   | 21  | 10  | 8   | 27  |
| OTU_39  | 0   | 0   | 1   | 0   | 0   | 6   | 0   |
| OTU_390 | 11  | 26  | 90  | 14  | 72  | 13  | 12  |
| OTU_391 | 0   | 0   | 0   | 0   | 0   | 0   | 6   |
| OTU_392 | 28  | 3   | 17  | 6   | 19  | 13  | 63  |
| OTU_394 | 2   | 15  | 1   | 10  | 3   | 11  | 6   |
| OTU_396 | 0   | 0   | 2   | 0   | 0   | 0   | 1   |
| OTU_397 | 20  | 60  | 9   | 43  | 31  | 19  | 73  |
| OTU_398 | 17  | 32  | 4   | 8   | 163 | 3   | 32  |
| OTU_399 | 1   | 1   | 0   | 1   | 2   | 1   | 0   |
| OTU_4   | 3   | 1   | 1   | 1   | 1   | 0   | 3   |
| OTU_40  | 2   | 1   | 1   | 0   | 0   | 0   | 0   |
| OTU_400 | 0   | 0   | 0   | 0   | 0   | 0   | 0   |
| OTU_401 | 0   | 4   | 4   | 0   | 9   | 0   | 0   |
| OTU_402 | 20  | 23  | 17  | 6   | 33  | 12  | 1   |
| OTU_403 | 0   | 0   | 4   | 0   | 1   | 0   | 0   |
| OTU_404 | 147 | 114 | 99  | 101 | 164 | 118 | 1   |
| OTU_405 | 84  | 6   | 16  | 47  | 20  | 66  | 20  |
| OTU_406 | 42  | 13  | 9   | 94  | 30  | 73  | 37  |
| OTU_407 | 75  | 239 | 12  | 55  | 96  | 22  | 59  |
| OTU_408 | 58  | 0   | 6   | 2   | 1   | 77  | 42  |
| OTU_409 | 24  | 49  | 35  | 11  | 96  | 63  | 20  |
| OTU_41  | 1   | 0   | 0   | 2   | 0   | 2   | 0   |
| OTU_410 | 1   | 35  | 8   | 33  | 13  | 21  | 39  |
| OTU_411 | 27  | 57  | 54  | 35  | 31  | 21  | 9   |
| OTU_412 | 4   | 61  | 1   | 9   | 9   | 19  | 46  |
| OTU_413 | 26  | 52  | 15  | 14  | 41  | 29  | 9   |
| OTU_414 | 42  | 21  | 35  | 12  | 12  | 16  | 23  |
| OTU_415 | 21  | 2   | 7   | 27  | 16  | 4   | 5   |
| OTU_416 | 7   | 15  | 2   | 25  | 56  | 37  | 41  |
| OTU_417 | 0   | 0   | 1   | 0   | 0   | 34  | 49  |
| OTU_418 | 25  | 18  | 17  | 18  | 32  | 69  | 6   |
| OTU_419 | 15  | 32  | 4   | 34  | 51  | 40  | 43  |
| OTU_42  | 1   | 5   | 0   | 0   | 0   | 0   | 0   |
| OTU_420 | 11  | 10  | 42  | 25  | 54  | 29  | 17  |
| OTU_421 | 6   | 2   | 12  | 25  | 13  | 12  | 16  |
| OTU_422 | 13  | 3   | 2   | 20  | 24  | 7   | 0   |
| OTU_423 | 12  | 1   | 62  | 155 | 93  | 10  | 107 |
| OTU_424 | 6   | 153 | 2   | 0   | 23  | 3   | 4   |
| OTU_425 | 0   | 0   | 0   | 0   | 0   | 28  | 0   |
| OTU_426 | 6   | 14  | 28  | 8   | 13  | 13  | 9   |
| OTU_427 | 2   | 0   | 11  | 9   | 7   | 23  | 0   |
| OTU_428 | 4   | 0   | 9   | 23  | 2   | 3   | 0   |

|         |     |     |     |     |     |     |     |
|---------|-----|-----|-----|-----|-----|-----|-----|
| OTU_429 | 5   | 16  | 10  | 10  | 10  | 6   | 3   |
| OTU_43  | 2   | 0   | 1   | 0   | 0   | 0   | 0   |
| OTU_430 | 12  | 13  | 1   | 4   | 0   | 3   | 2   |
| OTU_431 | 0   | 4   | 1   | 4   | 12  | 12  | 0   |
| OTU_432 | 24  | 9   | 14  | 0   | 3   | 2   | 2   |
| OTU_433 | 16  | 3   | 18  | 25  | 16  | 5   | 5   |
| OTU_434 | 0   | 23  | 0   | 0   | 2   | 25  | 0   |
| OTU_435 | 43  | 24  | 138 | 40  | 28  | 38  | 4   |
| OTU_436 | 1   | 2   | 11  | 1   | 2   | 6   | 5   |
| OTU_437 | 0   | 16  | 53  | 31  | 10  | 4   | 21  |
| OTU_438 | 0   | 1   | 0   | 3   | 2   | 0   | 2   |
| OTU_439 | 20  | 0   | 2   | 5   | 0   | 0   | 0   |
| OTU_44  | 0   | 1   | 2   | 3   | 0   | 0   | 0   |
| OTU_440 | 1   | 21  | 0   | 3   | 2   | 5   | 8   |
| OTU_441 | 232 | 107 | 589 | 70  | 296 | 100 | 34  |
| OTU_442 | 3   | 0   | 0   | 7   | 1   | 3   | 0   |
| OTU_443 | 2   | 0   | 0   | 11  | 0   | 0   | 0   |
| OTU_444 | 3   | 212 | 0   | 0   | 3   | 1   | 0   |
| OTU_445 | 0   | 0   | 0   | 0   | 0   | 15  | 0   |
| OTU_446 | 0   | 768 | 14  | 12  | 9   | 16  | 18  |
| OTU_447 | 229 | 7   | 577 | 295 | 206 | 368 | 57  |
| OTU_448 | 0   | 0   | 5   | 37  | 1   | 128 | 7   |
| OTU_449 | 175 | 2   | 1   | 508 | 113 | 339 | 324 |
| OTU_45  | 0   | 1   | 2   | 0   | 0   | 0   | 0   |
| OTU_450 | 60  | 31  | 39  | 38  | 12  | 18  | 33  |
| OTU_451 | 7   | 2   | 1   | 0   | 0   | 0   | 0   |
| OTU_452 | 1   | 23  | 0   | 5   | 11  | 5   | 31  |
| OTU_453 | 4   | 0   | 0   | 9   | 1   | 0   | 98  |
| OTU_454 | 4   | 0   | 1   | 0   | 0   | 3   | 0   |
| OTU_455 | 0   | 0   | 0   | 1   | 2   | 3   | 0   |
| OTU_456 | 2   | 5   | 0   | 3   | 3   | 5   | 4   |
| OTU_457 | 0   | 0   | 0   | 4   | 2   | 0   | 0   |
| OTU_458 | 0   | 1   | 2   | 2   | 2   | 6   | 0   |
| OTU_459 | 0   | 0   | 0   | 1   | 1   | 4   | 0   |
| OTU_460 | 72  | 91  | 187 | 382 | 492 | 56  | 78  |
| OTU_461 | 1   | 0   | 0   | 0   | 0   | 0   | 3   |
| OTU_462 | 1   | 0   | 0   | 0   | 0   | 1   | 1   |
| OTU_463 | 0   | 0   | 2   | 5   | 0   | 1   | 1   |
| OTU_464 | 77  | 0   | 495 | 23  | 293 | 138 | 13  |
| OTU_465 | 6   | 104 | 6   | 16  | 5   | 1   | 101 |
| OTU_466 | 1   | 68  | 9   | 27  | 27  | 22  | 42  |
| OTU_467 | 1   | 1   | 0   | 1   | 0   | 1   | 5   |
| OTU_468 | 263 | 0   | 211 | 426 | 188 | 0   | 33  |
| OTU_469 | 2   | 27  | 0   | 1   | 13  | 13  | 12  |
| OTU_47  | 0   | 0   | 0   | 0   | 0   | 2   | 0   |
| OTU_470 | 1   | 0   | 0   | 0   | 0   | 0   | 0   |
| OTU_471 | 116 | 251 | 663 | 57  | 5   | 290 | 115 |
| OTU_472 | 0   | 0   | 0   | 2   | 1   | 0   | 0   |
| OTU_473 | 0   | 0   | 0   | 4   | 2   | 6   | 2   |
| OTU_474 | 16  | 67  | 35  | 71  | 84  | 42  | 16  |
| OTU_475 | 17  | 5   | 14  | 1   | 26  | 2   | 1   |



|         |      |     |     |     |     |     |     |
|---------|------|-----|-----|-----|-----|-----|-----|
| OTU_476 | 0    | 3   | 0   | 0   | 0   | 0   | 2   |
| OTU_477 | 137  | 87  | 0   | 39  | 19  | 124 | 294 |
| OTU_478 | 1    | 4   | 0   | 0   | 0   | 0   | 12  |
| OTU_479 | 0    | 0   | 0   | 0   | 0   | 0   | 4   |
| OTU_48  | 3    | 0   | 0   | 0   | 0   | 0   | 0   |
| OTU_480 | 0    | 0   | 0   | 0   | 2   | 1   | 5   |
| OTU_481 | 0    | 0   | 0   | 0   | 0   | 0   | 1   |
| OTU_482 | 0    | 0   | 0   | 0   | 0   | 0   | 2   |
| OTU_483 | 1    | 0   | 6   | 9   | 5   | 16  | 21  |
| OTU_484 | 1    | 0   | 3   | 0   | 0   | 2   | 0   |
| OTU_485 | 15   | 24  | 9   | 47  | 41  | 23  | 74  |
| OTU_486 | 4    | 6   | 0   | 1   | 47  | 5   | 32  |
| OTU_488 | 4    | 23  | 9   | 15  | 33  | 5   | 19  |
| OTU_489 | 2    | 3   | 0   | 4   | 9   | 1   | 7   |
| OTU_49  | 0    | 3   | 0   | 0   | 0   | 0   | 0   |
| OTU_490 | 0    | 0   | 1   | 9   | 2   | 168 | 0   |
| OTU_491 | 0    | 1   | 0   | 0   | 1   | 1   | 0   |
| OTU_492 | 0    | 0   | 0   | 0   | 0   | 14  | 0   |
| OTU_493 | 0    | 3   | 1   | 0   | 2   | 1   | 0   |
| OTU_494 | 0    | 0   | 0   | 2   | 9   | 4   | 3   |
| OTU_495 | 0    | 0   | 0   | 343 | 0   | 89  | 0   |
| OTU_496 | 16   | 97  | 8   | 86  | 144 | 47  | 91  |
| OTU_497 | 0    | 3   | 12  | 14  | 26  | 7   | 0   |
| OTU_498 | 0    | 0   | 0   | 2   | 7   | 0   | 0   |
| OTU_499 | 0    | 0   | 3   | 25  | 26  | 6   | 0   |
| OTU_5   | 3    | 0   | 2   | 0   | 0   | 0   | 1   |
| OTU_50  | 2    | 21  | 5   | 255 | 52  | 30  | 0   |
| OTU_500 | 6    | 54  | 2   | 61  | 5   | 2   | 3   |
| OTU_501 | 8    | 0   | 0   | 74  | 1   | 1   | 1   |
| OTU_502 | 16   | 29  | 2   | 169 | 286 | 70  | 17  |
| OTU_503 | 0    | 0   | 0   | 0   | 0   | 0   | 0   |
| OTU_504 | 0    | 0   | 0   | 1   | 0   | 0   | 0   |
| OTU_505 | 0    | 0   | 0   | 0   | 0   | 0   | 0   |
| OTU_506 | 64   | 219 | 325 | 286 | 43  | 250 | 9   |
| OTU_507 | 0    | 0   | 0   | 1   | 4   | 0   | 0   |
| OTU_508 | 0    | 0   | 1   | 2   | 2   | 2   | 0   |
| OTU_509 | 0    | 1   | 1   | 1   | 2   | 1   | 0   |
| OTU_51  | 26   | 27  | 9   | 16  | 27  | 42  | 40  |
| OTU_510 | 73   | 63  | 204 | 68  | 46  | 182 | 40  |
| OTU_511 | 2    | 11  | 7   | 14  | 9   | 10  | 12  |
| OTU_512 | 0    | 1   | 0   | 0   | 2   | 0   | 0   |
| OTU_513 | 1237 | 474 | 898 | 35  | 248 | 678 | 204 |
| OTU_514 | 55   | 404 | 27  | 10  | 23  | 35  | 41  |
| OTU_515 | 28   | 17  | 8   | 6   | 184 | 33  | 135 |
| OTU_516 | 121  | 53  | 118 | 56  | 60  | 34  | 28  |
| OTU_517 | 68   | 62  | 9   | 112 | 63  | 43  | 38  |
| OTU_518 | 5    | 7   | 2   | 15  | 52  | 0   | 223 |
| OTU_519 | 248  | 5   | 3   | 0   | 59  | 0   | 2   |
| OTU_52  | 3    | 16  | 5   | 32  | 47  | 33  | 11  |
| OTU_520 | 15   | 48  | 8   | 34  | 64  | 51  | 66  |
| OTU_521 | 120  | 42  | 42  | 24  | 85  | 55  | 3   |

|         |     |     |     |     |     |     |     |
|---------|-----|-----|-----|-----|-----|-----|-----|
| OTU_522 | 16  | 60  | 36  | 31  | 26  | 46  | 40  |
| OTU_523 | 0   | 7   | 19  | 14  | 0   | 0   | 24  |
| OTU_524 | 3   | 4   | 26  | 20  | 7   | 16  | 33  |
| OTU_525 | 1   | 0   | 0   | 0   | 0   | 121 | 19  |
| OTU_526 | 0   | 582 | 1   | 0   | 0   | 138 | 0   |
| OTU_527 | 0   | 2   | 0   | 3   | 6   | 102 | 1   |
| OTU_528 | 13  | 6   | 5   | 17  | 5   | 29  | 15  |
| OTU_529 | 2   | 6   | 7   | 23  | 9   | 76  | 51  |
| OTU_53  | 0   | 2   | 2   | 10  | 3   | 24  | 1   |
| OTU_530 | 17  | 24  | 38  | 16  | 42  | 15  | 16  |
| OTU_531 | 14  | 19  | 17  | 12  | 11  | 7   | 10  |
| OTU_532 | 54  | 78  | 52  | 141 | 63  | 103 | 69  |
| OTU_533 | 10  | 26  | 8   | 60  | 32  | 35  | 39  |
| OTU_534 | 1   | 12  | 14  | 15  | 31  | 80  | 11  |
| OTU_535 | 6   | 22  | 10  | 22  | 6   | 8   | 17  |
| OTU_536 | 0   | 0   | 6   | 70  | 0   | 10  | 7   |
| OTU_537 | 0   | 10  | 0   | 41  | 9   | 0   | 0   |
| OTU_538 | 30  | 12  | 112 | 45  | 22  | 6   | 38  |
| OTU_539 | 10  | 7   | 0   | 1   | 5   | 2   | 1   |
| OTU_54  | 2   | 0   | 1   | 12  | 0   | 15  | 0   |
| OTU_540 | 0   | 0   | 0   | 1   | 0   | 35  | 0   |
| OTU_541 | 96  | 45  | 196 | 189 | 223 | 61  | 93  |
| OTU_542 | 4   | 3   | 24  | 45  | 21  | 26  | 10  |
| OTU_543 | 10  | 48  | 2   | 2   | 3   | 12  | 6   |
| OTU_544 | 1   | 3   | 1   | 10  | 7   | 7   | 12  |
| OTU_545 | 15  | 101 | 30  | 53  | 52  | 44  | 89  |
| OTU_546 | 5   | 5   | 50  | 11  | 3   | 7   | 4   |
| OTU_547 | 26  | 126 | 56  | 42  | 110 | 27  | 84  |
| OTU_548 | 22  | 107 | 39  | 38  | 114 | 84  | 62  |
| OTU_549 | 1   | 2   | 4   | 5   | 12  | 2   | 8   |
| OTU_55  | 0   | 0   | 0   | 0   | 0   | 2   | 0   |
| OTU_550 | 28  | 0   | 18  | 27  | 11  | 23  | 8   |
| OTU_551 | 1   | 1   | 19  | 28  | 15  | 4   | 0   |
| OTU_552 | 0   | 3   | 0   | 3   | 6   | 8   | 5   |
| OTU_553 | 0   | 3   | 3   | 0   | 2   | 6   | 12  |
| OTU_554 | 1   | 0   | 0   | 0   | 1   | 7   | 3   |
| OTU_555 | 0   | 26  | 29  | 21  | 16  | 12  | 14  |
| OTU_556 | 0   | 3   | 0   | 0   | 4   | 0   | 3   |
| OTU_557 | 3   | 1   | 0   | 5   | 0   | 0   | 12  |
| OTU_558 | 1   | 1   | 0   | 0   | 0   | 15  | 0   |
| OTU_559 | 0   | 0   | 0   | 4   | 1   | 0   | 0   |
| OTU_56  | 0   | 0   | 0   | 2   | 1   | 0   | 0   |
| OTU_560 | 6   | 3   | 0   | 3   | 3   | 9   | 3   |
| OTU_561 | 3   | 2   | 0   | 4   | 10  | 6   | 20  |
| OTU_562 | 4   | 0   | 3   | 2   | 7   | 0   | 1   |
| OTU_563 | 171 | 18  | 151 | 371 | 61  | 131 | 290 |
| OTU_564 | 0   | 0   | 0   | 0   | 0   | 17  | 0   |
| OTU_565 | 39  | 370 | 15  | 62  | 13  | 60  | 98  |
| OTU_566 | 0   | 0   | 0   | 0   | 0   | 18  | 0   |
| OTU_567 | 1   | 0   | 0   | 0   | 4   | 0   | 9   |
| OTU_568 | 11  | 0   | 1   | 10  | 1   | 31  | 4   |

|         |     |     |      |     |     |      |     |
|---------|-----|-----|------|-----|-----|------|-----|
| OTU_569 | 158 | 0   | 51   | 19  | 132 | 8    | 80  |
| OTU_57  | 2   | 0   | 0    | 1   | 0   | 1    | 1   |
| OTU_570 | 185 | 160 | 119  | 184 | 247 | 52   | 37  |
| OTU_571 | 0   | 4   | 7    | 4   | 6   | 6    | 3   |
| OTU_572 | 1   | 2   | 1    | 8   | 4   | 1    | 2   |
| OTU_573 | 317 | 164 | 95   | 1   | 2   | 174  | 87  |
| OTU_574 | 0   | 0   | 0    | 1   | 2   | 9    | 0   |
| OTU_575 | 5   | 1   | 3    | 2   | 1   | 0    | 1   |
| OTU_576 | 57  | 64  | 1    | 43  | 267 | 43   | 264 |
| OTU_577 | 3   | 1   | 8    | 6   | 5   | 10   | 6   |
| OTU_578 | 0   | 0   | 0    | 0   | 2   | 2    | 4   |
| OTU_579 | 1   | 0   | 1    | 52  | 17  | 43   | 3   |
| OTU_58  | 54  | 30  | 9    | 68  | 28  | 81   | 125 |
| OTU_580 | 0   | 0   | 0    | 5   | 0   | 0    | 0   |
| OTU_581 | 2   | 0   | 23   | 4   | 0   | 1    | 15  |
| OTU_582 | 0   | 0   | 0    | 0   | 2   | 5    | 14  |
| OTU_583 | 1   | 2   | 0    | 2   | 9   | 3    | 2   |
| OTU_584 | 0   | 4   | 0    | 0   | 9   | 2    | 1   |
| OTU_585 | 2   | 5   | 3    | 2   | 3   | 1    | 2   |
| OTU_586 | 9   | 6   | 20   | 1   | 13  | 53   | 22  |
| OTU_587 | 41  | 190 | 38   | 63  | 70  | 57   | 16  |
| OTU_588 | 19  | 5   | 1    | 28  | 18  | 3    | 284 |
| OTU_589 | 0   | 2   | 0    | 3   | 3   | 3    | 5   |
| OTU_59  | 0   | 1   | 0    | 0   | 0   | 1    | 2   |
| OTU_590 | 0   | 4   | 0    | 0   | 1   | 0    | 8   |
| OTU_591 | 1   | 4   | 12   | 0   | 1   | 7    | 4   |
| OTU_592 | 0   | 0   | 3    | 2   | 0   | 0    | 0   |
| OTU_593 | 23  | 0   | 60   | 57  | 2   | 2    | 150 |
| OTU_594 | 0   | 6   | 20   | 4   | 6   | 29   | 4   |
| OTU_595 | 6   | 0   | 0    | 0   | 0   | 2    | 0   |
| OTU_596 | 75  | 1   | 439  | 273 | 7   | 457  | 840 |
| OTU_597 | 239 | 5   | 1420 | 645 | 265 | 1500 | 138 |
| OTU_598 | 1   | 0   | 0    | 2   | 0   | 0    | 0   |
| OTU_599 | 6   | 0   | 1    | 4   | 10  | 23   | 7   |
| OTU_6   | 0   | 0   | 0    | 1   | 0   | 1    | 0   |
| OTU_60  | 24  | 1   | 1    | 6   | 3   | 22   | 21  |
| OTU_600 | 0   | 7   | 0    | 0   | 0   | 3    | 0   |
| OTU_601 | 65  | 50  | 36   | 54  | 60  | 27   | 37  |
| OTU_602 | 56  | 0   | 2    | 1   | 2   | 4    | 133 |
| OTU_603 | 0   | 1   | 0    | 1   | 0   | 0    | 0   |
| OTU_604 | 47  | 114 | 26   | 53  | 21  | 26   | 151 |
| OTU_605 | 1   | 0   | 2    | 0   | 2   | 2    | 0   |
| OTU_606 | 0   | 0   | 0    | 0   | 1   | 0    | 14  |
| OTU_607 | 8   | 0   | 3    | 0   | 0   | 0    | 7   |
| OTU_608 | 0   | 0   | 0    | 2   | 0   | 1    | 0   |
| OTU_609 | 1   | 0   | 0    | 0   | 0   | 1    | 0   |
| OTU_61  | 136 | 32  | 42   | 293 | 74  | 357  | 107 |
| OTU_610 | 10  | 14  | 8    | 122 | 66  | 28   | 42  |
| OTU_611 | 0   | 3   | 1    | 3   | 1   | 2    | 0   |
| OTU_612 | 0   | 0   | 0    | 2   | 1   | 1    | 4   |
| OTU_613 | 64  | 21  | 146  | 53  | 35  | 15   | 54  |

|         |     |     |     |     |     |     |     |
|---------|-----|-----|-----|-----|-----|-----|-----|
| OTU_614 | 0   | 0   | 1   | 0   | 20  | 0   | 11  |
| OTU_615 | 10  | 55  | 22  | 40  | 28  | 26  | 48  |
| OTU_616 | 10  | 15  | 15  | 0   | 0   | 17  | 23  |
| OTU_617 | 0   | 0   | 1   | 5   | 1   | 0   | 2   |
| OTU_618 | 0   | 0   | 0   | 1   | 0   | 0   | 0   |
| OTU_619 | 0   | 0   | 0   | 0   | 0   | 0   | 1   |
| OTU_62  | 0   | 0   | 0   | 0   | 0   | 0   | 1   |
| OTU_620 | 0   | 0   | 13  | 14  | 1   | 9   | 44  |
| OTU_621 | 0   | 10  | 1   | 1   | 2   | 0   | 5   |
| OTU_622 | 7   | 14  | 16  | 1   | 15  | 19  | 12  |
| OTU_623 | 1   | 1   | 3   | 6   | 1   | 2   | 6   |
| OTU_624 | 2   | 17  | 0   | 1   | 3   | 3   | 1   |
| OTU_625 | 0   | 7   | 0   | 0   | 0   | 0   | 0   |
| OTU_626 | 0   | 0   | 0   | 6   | 3   | 7   | 5   |
| OTU_627 | 0   | 0   | 0   | 1   | 0   | 0   | 0   |
| OTU_628 | 0   | 0   | 0   | 0   | 1   | 1   | 0   |
| OTU_629 | 1   | 1   | 1   | 2   | 0   | 0   | 0   |
| OTU_63  | 46  | 83  | 27  | 136 | 105 | 115 | 69  |
| OTU_630 | 0   | 0   | 0   | 1   | 1   | 1   | 0   |
| OTU_631 | 0   | 0   | 0   | 0   | 0   | 0   | 2   |
| OTU_632 | 5   | 11  | 1   | 6   | 13  | 25  | 33  |
| OTU_633 | 0   | 0   | 1   | 1   | 0   | 1   | 8   |
| OTU_634 | 0   | 0   | 0   | 1   | 0   | 0   | 3   |
| OTU_635 | 0   | 0   | 0   | 0   | 6   | 2   | 0   |
| OTU_636 | 0   | 0   | 0   | 2   | 0   | 0   | 1   |
| OTU_637 | 0   | 1   | 0   | 0   | 0   | 0   | 11  |
| OTU_638 | 0   | 0   | 1   | 1   | 3   | 18  | 6   |
| OTU_639 | 0   | 0   | 0   | 0   | 0   | 0   | 1   |
| OTU_64  | 445 | 166 | 77  | 25  | 4   | 100 | 82  |
| OTU_640 | 0   | 0   | 0   | 0   | 0   | 0   | 1   |
| OTU_641 | 0   | 0   | 0   | 0   | 2   | 1   | 5   |
| OTU_642 | 0   | 2   | 1   | 1   | 12  | 2   | 25  |
| OTU_643 | 0   | 0   | 0   | 0   | 0   | 0   | 2   |
| OTU_644 | 0   | 0   | 9   | 3   | 2   | 5   | 4   |
| OTU_645 | 0   | 1   | 0   | 0   | 0   | 0   | 0   |
| OTU_646 | 3   | 8   | 6   | 9   | 2   | 10  | 17  |
| OTU_647 | 0   | 1   | 0   | 0   | 0   | 1   | 7   |
| OTU_648 | 0   | 0   | 0   | 22  | 0   | 13  | 9   |
| OTU_649 | 0   | 1   | 6   | 14  | 1   | 1   | 68  |
| OTU_65  | 385 | 272 | 217 | 90  | 86  | 83  | 205 |
| OTU_650 | 0   | 0   | 0   | 0   | 0   | 14  | 7   |
| OTU_651 | 0   | 0   | 0   | 0   | 0   | 0   | 1   |
| OTU_652 | 0   | 0   | 0   | 0   | 5   | 3   | 0   |
| OTU_653 | 0   | 1   | 0   | 0   | 1   | 0   | 0   |
| OTU_654 | 0   | 0   | 24  | 8   | 7   | 31  | 5   |
| OTU_655 | 0   | 0   | 0   | 1   | 4   | 0   | 0   |
| OTU_656 | 3   | 143 | 6   | 7   | 58  | 18  | 0   |
| OTU_657 | 0   | 0   | 88  | 102 | 0   | 2   | 0   |
| OTU_658 | 1   | 1   | 2   | 0   | 0   | 1   | 0   |
| OTU_659 | 0   | 0   | 0   | 2   | 0   | 0   | 0   |
| OTU_66  | 75  | 27  | 457 | 10  | 337 | 81  | 97  |

|         |     |     |     |     |     |     |     |
|---------|-----|-----|-----|-----|-----|-----|-----|
| OTU_660 | 1   | 0   | 2   | 0   | 0   | 1   | 4   |
| OTU_661 | 913 | 70  | 343 | 269 | 712 | 200 | 24  |
| OTU_662 | 10  | 21  | 1   | 13  | 106 | 11  | 71  |
| OTU_663 | 23  | 0   | 10  | 88  | 81  | 126 | 39  |
| OTU_664 | 0   | 0   | 1   | 1   | 0   | 0   | 0   |
| OTU_665 | 0   | 0   | 0   | 2   | 0   | 0   | 0   |
| OTU_667 | 0   | 0   | 3   | 0   | 2   | 6   | 0   |
| OTU_668 | 11  | 22  | 15  | 54  | 18  | 19  | 4   |
| OTU_669 | 0   | 5   | 3   | 2   | 10  | 0   | 1   |
| OTU_67  | 154 | 44  | 447 | 107 | 443 | 112 | 97  |
| OTU_670 | 0   | 2   | 0   | 1   | 0   | 0   | 0   |
| OTU_671 | 0   | 0   | 0   | 0   | 1   | 0   | 0   |
| OTU_672 | 0   | 0   | 0   | 0   | 5   | 0   | 2   |
| OTU_675 | 0   | 1   | 0   | 0   | 0   | 0   | 0   |
| OTU_676 | 0   | 0   | 1   | 0   | 2   | 1   | 0   |
| OTU_677 | 0   | 0   | 0   | 0   | 2   | 0   | 0   |
| OTU_678 | 4   | 0   | 24  | 1   | 2   | 47  | 0   |
| OTU_679 | 0   | 1   | 0   | 2   | 1   | 0   | 3   |
| OTU_68  | 211 | 139 | 74  | 116 | 174 | 202 | 83  |
| OTU_680 | 0   | 1   | 0   | 0   | 1   | 1   | 0   |
| OTU_681 | 0   | 2   | 0   | 0   | 0   | 0   | 1   |
| OTU_682 | 0   | 5   | 0   | 1   | 1   | 2   | 2   |
| OTU_683 | 0   | 9   | 0   | 0   | 0   | 4   | 3   |
| OTU_684 | 0   | 44  | 0   | 0   | 0   | 2   | 0   |
| OTU_685 | 19  | 46  | 147 | 10  | 9   | 51  | 52  |
| OTU_686 | 53  | 84  | 97  | 41  | 5   | 7   | 7   |
| OTU_687 | 31  | 1   | 11  | 37  | 3   | 2   | 12  |
| OTU_688 | 8   | 0   | 1   | 23  | 10  | 0   | 27  |
| OTU_689 | 7   | 0   | 3   | 15  | 9   | 12  | 8   |
| OTU_69  | 23  | 16  | 25  | 9   | 2   | 188 | 82  |
| OTU_690 | 25  | 7   | 6   | 1   | 4   | 8   | 3   |
| OTU_691 | 4   | 3   | 1   | 6   | 10  | 3   | 8   |
| OTU_692 | 1   | 2   | 20  | 18  | 2   | 1   | 0   |
| OTU_693 | 5   | 4   | 1   | 6   | 2   | 4   | 1   |
| OTU_694 | 3   | 0   | 6   | 12  | 1   | 1   | 1   |
| OTU_695 | 1   | 0   | 0   | 1   | 0   | 0   | 1   |
| OTU_696 | 1   | 0   | 1   | 2   | 1   | 0   | 0   |
| OTU_697 | 0   | 0   | 0   | 0   | 0   | 0   | 1   |
| OTU_698 | 0   | 0   | 0   | 1   | 0   | 0   | 0   |
| OTU_699 | 0   | 0   | 0   | 0   | 1   | 0   | 0   |
| OTU_7   | 135 | 70  | 2   | 113 | 54  | 187 | 138 |
| OTU_70  | 73  | 70  | 31  | 84  | 136 | 452 | 34  |
| OTU_701 | 0   | 1   | 0   | 0   | 2   | 0   | 0   |
| OTU_702 | 0   | 0   | 0   | 0   | 0   | 1   | 0   |
| OTU_703 | 0   | 0   | 0   | 0   | 0   | 7   | 0   |
| OTU_704 | 0   | 0   | 0   | 17  | 0   | 2   | 0   |
| OTU_705 | 0   | 0   | 0   | 5   | 0   | 2   | 1   |
| OTU_707 | 0   | 0   | 0   | 1   | 0   | 0   | 0   |
| OTU_71  | 32  | 23  | 29  | 112 | 116 | 94  | 2   |
| OTU_72  | 47  | 40  | 12  | 3   | 5   | 29  | 99  |
| OTU_73  | 135 | 15  | 86  | 129 | 51  | 100 | 89  |

|        |     |     |     |     |     |     |     |
|--------|-----|-----|-----|-----|-----|-----|-----|
| OTU_74 | 52  | 22  | 9   | 11  | 3   | 96  | 48  |
| OTU_75 | 38  | 10  | 24  | 13  | 26  | 19  | 31  |
| OTU_76 | 100 | 41  | 45  | 32  | 25  | 37  | 41  |
| OTU_77 | 24  | 25  | 13  | 30  | 18  | 35  | 12  |
| OTU_78 | 21  | 23  | 16  | 18  | 18  | 20  | 46  |
| OTU_79 | 1   | 1   | 0   | 6   | 2   | 7   | 11  |
| OTU_8  | 417 | 228 | 168 | 81  | 17  | 74  | 10  |
| OTU_80 | 1   | 1   | 0   | 3   | 8   | 13  | 3   |
| OTU_81 | 0   | 0   | 0   | 2   | 2   | 2   | 2   |
| OTU_82 | 2   | 0   | 3   | 1   | 0   | 5   | 10  |
| OTU_83 | 0   | 0   | 0   | 3   | 0   | 17  | 0   |
| OTU_84 | 1   | 0   | 0   | 1   | 11  | 2   | 4   |
| OTU_85 | 0   | 0   | 1   | 1   | 2   | 0   | 4   |
| OTU_86 | 0   | 0   | 0   | 4   | 0   | 3   | 0   |
| OTU_87 | 0   | 0   | 4   | 1   | 1   | 0   | 1   |
| OTU_88 | 229 | 553 | 24  | 266 | 196 | 226 | 103 |
| OTU_89 | 1   | 2   | 0   | 1   | 3   | 3   | 0   |
| OTU_9  | 2   | 16  | 12  | 3   | 41  | 17  | 7   |
| OTU_90 | 1   | 0   | 0   | 2   | 0   | 2   | 0   |
| OTU_91 | 0   | 0   | 0   | 0   | 1   | 1   | 2   |
| OTU_92 | 0   | 2   | 0   | 0   | 1   | 1   | 1   |
| OTU_93 | 1   | 0   | 4   | 0   | 2   | 0   | 5   |
| OTU_94 | 0   | 0   | 2   | 1   | 0   | 1   | 1   |
| OTU_95 | 1   | 0   | 1   | 0   | 4   | 1   | 2   |
| OTU_96 | 0   | 3   | 1   | 1   | 2   | 0   | 1   |
| OTU_97 | 0   | 0   | 0   | 1   | 3   | 1   | 1   |
| OTU_98 | 0   | 2   | 0   | 1   | 1   | 0   | 0   |
| OTU_99 | 0   | 0   | 2   | 0   | 5   | 1   | 3   |

| B28BP22 | B28BP23 |
|---------|---------|
| 275     | 260     |
| 0       | 9       |
| 2       | 4       |
| 1       | 1       |
| 2       | 5       |
| 3       | 5       |
| 1       | 0       |
| 3       | 2       |
| 7       | 4       |
| 2       | 1       |
| 3       | 5       |
| 1       | 1       |
| 9       | 4       |
| 1       | 1       |
| 1       | 2       |
| 2       | 1       |
| 3       | 6       |
| 0       | 0       |
| 1       | 5       |
| 0       | 2       |
| 0       | 1       |
| 1       | 2       |
| 6       | 3       |
| 0       | 1       |
| 0       | 3       |
| 0       | 0       |
| 0       | 0       |
| 104     | 74      |
| 1       | 4       |
| 1       | 0       |
| 0       | 0       |
| 3       | 2       |
| 11      | 13      |
| 0       | 2       |
| 3       | 1       |
| 2       | 0       |
| 1       | 1       |
| 1       | 0       |
| 0       | 1       |
| 1       | 0       |
| 0       | 0       |
| 0       | 0       |
| 39      | 23      |
| 8       | 1       |
| 0       | 5       |
| 1       | 0       |
| 217     | 218     |
| 90      | 178     |
| 41      | 109     |
| 13      | 23      |

|    |    |
|----|----|
| 4  | 30 |
| 3  | 62 |
| 9  | 0  |
| 2  | 5  |
| 4  | 0  |
| 4  | 5  |
| 4  | 1  |
| 0  | 2  |
| 0  | 2  |
| 1  | 2  |
| 1  | 0  |
| 0  | 1  |
| 1  | 2  |
| 0  | 1  |
| 0  | 3  |
| 0  | 0  |
| 2  | 6  |
| 1  | 3  |
| 6  | 1  |
| 0  | 1  |
| 2  | 4  |
| 2  | 1  |
| 0  | 0  |
| 0  | 1  |
| 5  | 4  |
| 1  | 0  |
| 6  | 2  |
| 2  | 2  |
| 0  | 2  |
| 0  | 1  |
| 3  | 5  |
| 4  | 0  |
| 1  | 1  |
| 6  | 5  |
| 1  | 1  |
| 2  | 0  |
| 0  | 6  |
| 13 | 12 |
| 0  | 1  |
| 0  | 0  |
| 0  | 0  |
| 1  | 2  |
| 0  | 2  |
| 2  | 3  |
| 0  | 0  |
| 1  | 1  |
| 5  | 4  |
| 0  | 0  |
| 1  | 2  |
| 0  | 1  |
| 2  | 1  |



|     |     |
|-----|-----|
| 0   | 2   |
| 0   | 1   |
| 31  | 97  |
| 18  | 1   |
| 16  | 9   |
| 0   | 1   |
| 10  | 8   |
| 1   | 4   |
| 0   | 1   |
| 0   | 2   |
| 0   | 0   |
| 0   | 1   |
| 0   | 2   |
| 0   | 1   |
| 0   | 0   |
| 6   | 38  |
| 81  | 18  |
| 0   | 8   |
| 1   | 0   |
| 2   | 0   |
| 130 | 91  |
| 5   | 1   |
| 0   | 1   |
| 0   | 11  |
| 2   | 0   |
| 1   | 0   |
| 0   | 0   |
| 0   | 0   |
| 0   | 4   |
| 0   | 0   |
| 2   | 15  |
| 0   | 0   |
| 0   | 2   |
| 5   | 1   |
| 471 | 163 |
| 224 | 93  |
| 193 | 52  |
| 1   | 0   |
| 84  | 95  |
| 1   | 0   |
| 253 | 166 |
| 56  | 73  |
| 32  | 25  |
| 50  | 74  |
| 68  | 1   |
| 65  | 34  |
| 95  | 51  |
| 21  | 95  |
| 110 | 61  |
| 60  | 36  |
| 1   | 1   |

|      |      |
|------|------|
| 28   | 0    |
| 17   | 11   |
| 14   | 48   |
| 0    | 0    |
| 75   | 0    |
| 0    | 22   |
| 4    | 18   |
| 0    | 0    |
| 1    | 16   |
| 2    | 0    |
| 0    | 3    |
| 6    | 6    |
| 7    | 8    |
| 8    | 1    |
| 9    | 3    |
| 7    | 23   |
| 3    | 0    |
| 4    | 7    |
| 1377 | 680  |
| 220  | 1178 |
| 0    | 2    |
| 0    | 1    |
| 0    | 0    |
| 0    | 0    |
| 3    | 0    |
| 0    | 0    |
| 8    | 4    |
| 0    | 68   |
| 0    | 1    |
| 1    | 0    |
| 0    | 0    |
| 70   | 41   |
| 9    | 4    |
| 876  | 0    |
| 33   | 25   |
| 50   | 47   |
| 87   | 22   |
| 27   | 13   |
| 3    | 46   |
| 2    | 5    |
| 13   | 4    |
| 0    | 36   |
| 4    | 0    |
| 0    | 0    |
| 0    | 0    |
| 7    | 20   |
| 44   | 64   |
| 1    | 0    |
| 0    | 3    |
| 42   | 77   |
| 160  | 501  |

|     |     |
|-----|-----|
| 9   | 1   |
| 1   | 0   |
| 0   | 3   |
| 1   | 0   |
| 18  | 10  |
| 6   | 1   |
| 50  | 1   |
| 56  | 49  |
| 0   | 0   |
| 0   | 0   |
| 139 | 0   |
| 1   | 3   |
| 7   | 2   |
| 0   | 1   |
| 11  | 4   |
| 2   | 0   |
| 6   | 1   |
| 0   | 1   |
| 80  | 149 |
| 29  | 44  |
| 26  | 52  |
| 2   | 0   |
| 7   | 5   |
| 286 | 35  |
| 15  | 22  |
| 0   | 0   |
| 3   | 1   |
| 67  | 11  |
| 31  | 13  |
| 112 | 55  |
| 0   | 2   |
| 0   | 0   |
| 24  | 45  |
| 28  | 259 |
| 3   | 1   |
| 0   | 1   |
| 13  | 9   |
| 4   | 11  |
| 10  | 10  |
| 0   | 1   |
| 28  | 2   |
| 2   | 1   |
| 1   | 0   |
| 15  | 12  |
| 0   | 51  |
| 187 | 141 |
| 3   | 0   |
| 13  | 19  |
| 26  | 36  |
| 4   | 16  |
| 10  | 4   |

|    |     |
|----|-----|
| 10 | 47  |
| 49 | 64  |
| 0  | 0   |
| 6  | 12  |
| 10 | 5   |
| 19 | 42  |
| 2  | 0   |
| 16 | 0   |
| 65 | 2   |
| 10 | 42  |
| 3  | 12  |
| 23 | 34  |
| 6  | 7   |
| 0  | 13  |
| 7  | 16  |
| 8  | 16  |
| 65 | 144 |
| 0  | 0   |
| 8  | 6   |
| 1  | 3   |
| 12 | 10  |
| 2  | 2   |
| 0  | 0   |
| 1  | 1   |
| 61 | 30  |
| 4  | 4   |
| 3  | 1   |
| 24 | 40  |
| 0  | 1   |
| 7  | 6   |
| 0  | 0   |
| 18 | 94  |
| 2  | 5   |
| 2  | 0   |
| 16 | 22  |
| 9  | 3   |
| 5  | 4   |
| 1  | 17  |
| 0  | 2   |
| 0  | 0   |
| 30 | 11  |
| 0  | 0   |
| 5  | 1   |
| 1  | 0   |
| 8  | 2   |
| 0  | 6   |
| 3  | 36  |
| 8  | 2   |
| 0  | 2   |
| 2  | 4   |
| 1  | 0   |

|     |     |
|-----|-----|
| 2   | 2   |
| 0   | 21  |
| 48  | 123 |
| 44  | 45  |
| 0   | 0   |
| 0   | 3   |
| 2   | 5   |
| 8   | 7   |
| 7   | 22  |
| 2   | 0   |
| 18  | 10  |
| 0   | 6   |
| 10  | 21  |
| 9   | 6   |
| 1   | 1   |
| 32  | 31  |
| 109 | 16  |
| 1   | 1   |
| 8   | 2   |
| 0   | 0   |
| 1   | 0   |
| 0   | 4   |
| 12  | 4   |
| 0   | 0   |
| 114 | 49  |
| 21  | 41  |
| 23  | 23  |
| 60  | 43  |
| 16  | 38  |
| 5   | 2   |
| 1   | 6   |
| 11  | 4   |
| 20  | 16  |
| 53  | 48  |
| 10  | 11  |
| 10  | 9   |
| 1   | 2   |
| 50  | 22  |
| 1   | 2   |
| 11  | 31  |
| 39  | 69  |
| 0   | 0   |
| 14  | 12  |
| 15  | 2   |
| 4   | 0   |
| 93  | 25  |
| 1   | 35  |
| 0   | 161 |
| 6   | 6   |
| 13  | 58  |
| 9   | 4   |

|     |     |
|-----|-----|
| 7   | 17  |
| 0   | 0   |
| 4   | 1   |
| 0   | 1   |
| 2   | 3   |
| 27  | 3   |
| 0   | 2   |
| 14  | 23  |
| 7   | 7   |
| 14  | 7   |
| 6   | 4   |
| 0   | 0   |
| 0   | 0   |
| 4   | 3   |
| 235 | 184 |
| 1   | 6   |
| 0   | 0   |
| 8   | 2   |
| 0   | 13  |
| 31  | 18  |
| 249 | 271 |
| 64  | 14  |
| 121 | 86  |
| 0   | 1   |
| 24  | 18  |
| 0   | 2   |
| 10  | 8   |
| 174 | 236 |
| 0   | 0   |
| 1   | 1   |
| 2   | 0   |
| 5   | 3   |
| 0   | 3   |
| 1   | 5   |
| 302 | 323 |
| 0   | 0   |
| 0   | 1   |
| 1   | 0   |
| 163 | 6   |
| 18  | 70  |
| 23  | 36  |
| 0   | 3   |
| 78  | 13  |
| 26  | 18  |
| 0   | 3   |
| 0   | 0   |
| 62  | 68  |
| 0   | 0   |
| 0   | 1   |
| 10  | 21  |
| 1   | 1   |

|     |     |
|-----|-----|
| 0   | 0   |
| 114 | 190 |
| 5   | 3   |
| 0   | 2   |
| 0   | 0   |
| 0   | 1   |
| 0   | 0   |
| 0   | 0   |
| 8   | 6   |
| 0   | 0   |
| 41  | 63  |
| 13  | 13  |
| 13  | 27  |
| 14  | 4   |
| 0   | 0   |
| 486 | 5   |
| 3   | 1   |
| 276 | 5   |
| 3   | 6   |
| 15  | 7   |
| 90  | 0   |
| 40  | 123 |
| 6   | 4   |
| 1   | 0   |
| 3   | 3   |
| 0   | 0   |
| 18  | 3   |
| 33  | 30  |
| 2   | 0   |
| 46  | 33  |
| 1   | 0   |
| 0   | 0   |
| 0   | 1   |
| 0   | 79  |
| 0   | 0   |
| 0   | 0   |
| 1   | 0   |
| 48  | 16  |
| 45  | 8   |
| 10  | 11  |
| 0   | 1   |
| 571 | 388 |
| 51  | 31  |
| 69  | 47  |
| 28  | 22  |
| 8   | 23  |
| 46  | 1   |
| 2   | 0   |
| 3   | 19  |
| 16  | 29  |
| 17  | 23  |

|     |     |
|-----|-----|
| 66  | 43  |
| 102 | 2   |
| 21  | 30  |
| 3   | 265 |
| 0   | 3   |
| 2   | 0   |
| 21  | 23  |
| 47  | 65  |
| 7   | 34  |
| 13  | 18  |
| 8   | 17  |
| 108 | 102 |
| 60  | 45  |
| 31  | 36  |
| 23  | 16  |
| 0   | 4   |
| 8   | 0   |
| 49  | 16  |
| 25  | 3   |
| 6   | 0   |
| 0   | 203 |
| 64  | 54  |
| 15  | 8   |
| 12  | 1   |
| 1   | 5   |
| 85  | 65  |
| 1   | 5   |
| 65  | 82  |
| 46  | 24  |
| 17  | 3   |
| 0   | 0   |
| 19  | 51  |
| 1   | 14  |
| 2   | 5   |
| 6   | 8   |
| 11  | 24  |
| 19  | 4   |
| 35  | 2   |
| 2   | 13  |
| 1   | 7   |
| 13  | 94  |
| 0   | 0   |
| 3   | 11  |
| 18  | 5   |
| 3   | 5   |
| 139 | 120 |
| 0   | 0   |
| 83  | 91  |
| 0   | 9   |
| 1   | 0   |
| 8   | 1   |



|     |     |
|-----|-----|
| 47  | 378 |
| 1   | 1   |
| 75  | 37  |
| 1   | 3   |
| 5   | 1   |
| 1   | 336 |
| 10  | 7   |
| 0   | 0   |
| 157 | 118 |
| 13  | 3   |
| 3   | 2   |
| 47  | 12  |
| 120 | 243 |
| 0   | 1   |
| 0   | 7   |
| 6   | 0   |
| 2   | 7   |
| 3   | 4   |
| 2   | 2   |
| 18  | 24  |
| 29  | 28  |
| 21  | 34  |
| 15  | 5   |
| 3   | 3   |
| 1   | 3   |
| 5   | 4   |
| 0   | 1   |
| 17  | 84  |
| 7   | 3   |
| 0   | 1   |
| 324 | 428 |
| 676 | 493 |
| 2   | 0   |
| 11  | 2   |
| 0   | 3   |
| 14  | 1   |
| 0   | 5   |
| 39  | 29  |
| 11  | 1   |
| 1   | 4   |
| 157 | 34  |
| 0   | 1   |
| 0   | 0   |
| 0   | 0   |
| 2   | 1   |
| 1   | 0   |
| 202 | 252 |
| 211 | 122 |
| 3   | 0   |
| 3   | 8   |
| 56  | 25  |

|     |     |
|-----|-----|
| 5   | 37  |
| 20  | 17  |
| 0   | 48  |
| 0   | 4   |
| 0   | 0   |
| 3   | 1   |
| 0   | 0   |
| 5   | 9   |
| 3   | 5   |
| 27  | 28  |
| 1   | 2   |
| 5   | 11  |
| 2   | 0   |
| 7   | 11  |
| 0   | 0   |
| 0   | 0   |
| 0   | 0   |
| 139 | 259 |
| 1   | 1   |
| 0   | 0   |
| 9   | 12  |
| 0   | 7   |
| 0   | 0   |
| 0   | 0   |
| 1   | 1   |
| 0   | 0   |
| 5   | 1   |
| 0   | 1   |
| 76  | 77  |
| 0   | 0   |
| 1   | 3   |
| 10  | 6   |
| 1   | 1   |
| 8   | 6   |
| 0   | 0   |
| 12  | 12  |
| 0   | 1   |
| 12  | 1   |
| 18  | 31  |
| 215 | 366 |
| 0   | 28  |
| 2   | 0   |
| 4   | 0   |
| 1   | 0   |
| 32  | 20  |
| 1   | 1   |
| 156 | 62  |
| 251 | 62  |
| 1   | 4   |
| 1   | 0   |
| 101 | 415 |

|     |     |
|-----|-----|
| 8   | 0   |
| 122 | 247 |
| 58  | 41  |
| 99  | 174 |
| 0   | 0   |
| 0   | 0   |
| 0   | 1   |
| 24  | 8   |
| 3   | 1   |
| 81  | 123 |
| 0   | 1   |
| 0   | 2   |
| 1   | 0   |
| 0   | 0   |
| 1   | 0   |
| 0   | 0   |
| 11  | 14  |
| 1   | 0   |
| 84  | 50  |
| 0   | 0   |
| 0   | 0   |
| 0   | 2   |
| 1   | 0   |
| 0   | 0   |
| 22  | 68  |
| 6   | 5   |
| 8   | 6   |
| 0   | 5   |
| 6   | 7   |
| 67  | 99  |
| 0   | 0   |
| 6   | 11  |
| 2   | 5   |
| 2   | 2   |
| 2   | 2   |
| 0   | 3   |
| 0   | 0   |
| 0   | 0   |
| 0   | 1   |
| 0   | 0   |
| 39  | 79  |
| 108 | 106 |
| 0   | 0   |
| 0   | 0   |
| 0   | 0   |
| 1   | 0   |
| 1   | 0   |
| 0   | 0   |
| 25  | 63  |
| 28  | 57  |
| 120 | 140 |

|     |     |
|-----|-----|
| 61  | 98  |
| 13  | 37  |
| 40  | 77  |
| 31  | 34  |
| 15  | 54  |
| 8   | 11  |
| 40  | 29  |
| 6   | 8   |
| 5   | 3   |
| 0   | 2   |
| 1   | 0   |
| 15  | 2   |
| 2   | 3   |
| 3   | 0   |
| 1   | 8   |
| 194 | 176 |
| 1   | 2   |
| 6   | 5   |
| 3   | 5   |
| 2   | 4   |
| 2   | 2   |
| 3   | 7   |
| 1   | 5   |
| 2   | 3   |
| 3   | 5   |
| 1   | 8   |
| 2   | 5   |
| 1   | 8   |
